# Supplementary material for: Fertilization and developmental competence of in vitro fertilized embryos from C57BL/6J mice of different ages and the impact of vitrification
Source: PubMed Central journal article supplement — J Reprod Dev. 2024 Oct 25;70(6):405–10. doi: 10.1262/jrd.2024-082 (PMC11658927; doi:10.1262/jrd.2024-082), 2024-10-25
Supplement: jrd-70-405-s001.pdf [file jrd-70-405-s001.pdf]

**Supplementary Table 1.** Fertilization and first cleavage division of oocytes from various age of C57BL/6J mice

| Age (weeks) | Total no. of normal oocytes at 6 h PI | No. fertilized oocytes at 6 h PI (% $\pm$ MSE) <sup>a</sup> | No. 2-cell at 24 h PI (% $\pm$ MSE) <sup>a</sup> |
|-------------|---------------------------------------|-------------------------------------------------------------|--------------------------------------------------|
| 3           | 353                                   | 346 (97 $\pm$ 2)                                            | 323 (93 <sup>b</sup> $\pm$ 2)                    |
| 4           | 324                                   | 315 (98 $\pm$ 1)                                            | 312 (97 <sup>c</sup> $\pm$ 1)                    |
| 5           | 207                                   | 201 (98 $\pm$ 1)                                            | 192 (92 <sup>b</sup> $\pm$ 3)                    |
| 6           | 207                                   | 206 (99 $\pm$ 1)                                            | 206 (99 <sup>c</sup> $\pm$ 1)                    |
| 8           | 221                                   | 215 (97 $\pm$ 2)                                            | 213 (96 <sup>bc</sup> $\pm$ 2)                   |
| 10          | 292                                   | 289 (99 $\pm$ 1)                                            | 288 (98 <sup>c</sup> $\pm$ 1)                    |

<sup>a</sup> Percentages and mean standard error (MSE) of normal oocytes at 6h PI. <sup>bc</sup> Percentages with different superscripts within the same column were significantly different ( $P < 0.05$ ).

**Supplementary Table 2.** Survival of frozen-thawed IVF 2-cell embryos from various ages of C57BL/6J mice

| Age (weeks) | Total no. of frozen embryos | Recovered | No. embryos with normal morphology after thawing (% $\pm$ MSE) <sup>a</sup> |
|-------------|-----------------------------|-----------|-----------------------------------------------------------------------------|
| 3           | 318                         | 317       | 288 (92 $\pm$ 3)                                                            |
| 4           | 279                         | 275       | 268 (96 $\pm$ 1)                                                            |
| 5           | 131                         | 129       | 126 (96 $\pm$ 2)                                                            |
| 6           | 71                          | 69        | 63 (88 $\pm$ 5)                                                             |
| 8           | 113                         | 110       | 108 (95 $\pm$ 2)                                                            |
| 10          | 166                         | 165       | 160 (97 $\pm$ 2)                                                            |

<sup>a</sup> Percentages and mean standard error (MSE) of total frozen embryos.
